# Supplementary material for: Characterization of the complete chloroplast genome of the medicinal herb Eleutherococcus nodiflorus and its phylogenetic implications
Source: PubMed Central journal article supplement (PMC9629086; doi:10.1080/23802359.2022.2116954), 2022-10-30

## Supplementary Figure

### Characterization of the complete chloroplast genome of the medicinal herb *Eleutherococcus nodiflorus* and its phylogenetic implications

Minjun Li<sup>1</sup>, Qiuyi Gong<sup>1</sup>, Manjia Zhou<sup>1</sup>, Qiang Liu<sup>1</sup>, Rubin Cheng<sup>1,2</sup>\*

<sup>1</sup> School of Pharmaceutical Sciences, Zhejiang Chinese Medical University, Hangzhou, China

<sup>2</sup> Academy of Chinese Medical Science, Zhejiang Chinese Medical University

\*Correspondence: Rubin Cheng

Figure S1

Nucleotide diversity ( $P_i$ ) in the cp chloroplast genomes of *Eleutherococcus nodiflorus* and other 4 species from tribe Araliaceae (*Eleutherococcus trifoliatus*, *Eleutherococcus brachypus*, *Eleutherococcus senticosus*, *Eleutherococcus sessiliflorus*). Window length = 600bp; Step size = 200bp. The detailed location of the midpoint was displayed at the x-axis, while the nucleotide diversity of each window was presented at the Y-axis.

Figure S1

Nucleotide diversity ( $P_i$ ) in the cp chloroplast genomes of *Eleutherococcus nodiflorus* and other 4 species from tribe Araliaceae.

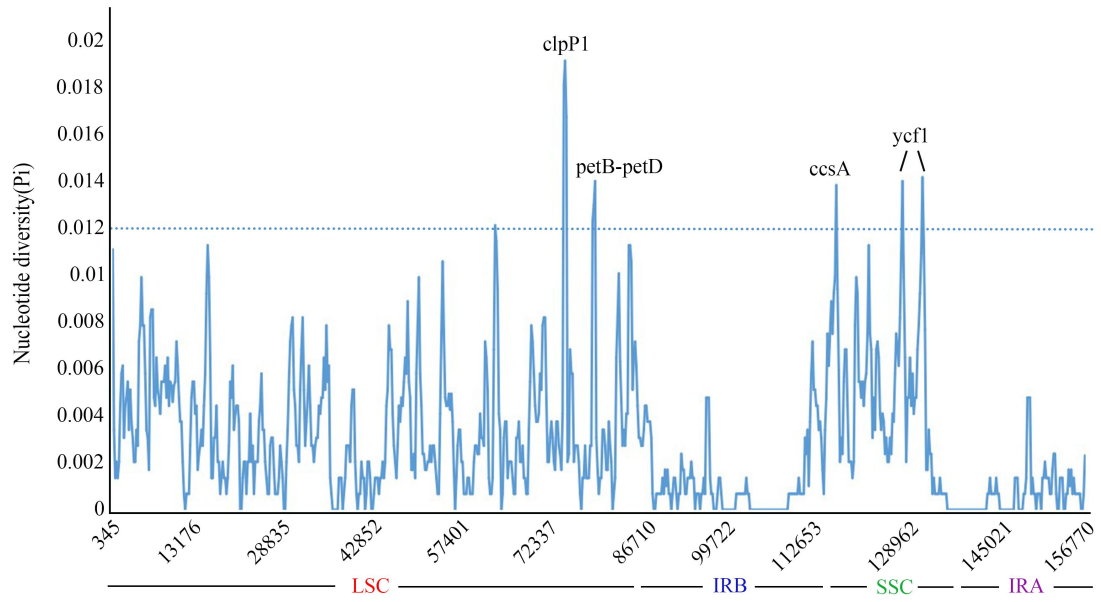

Supplement: TMDN_A_2116954_SM5916.pdf [file TMDN_A_2116954_SM5916.pdf]
